# Supplementary material
Source: MDPI journal article supplement (https://www.mdpi.com/2304-6740/11/7/300)
Supplement: s1 [file s1 › inorganics-2493058-supplementary.pdf]

## Experimental

### 1. Chemicals

Nickel (II) nitrate hexahydrate ( $\text{Ni}(\text{NO}_3)_2 \cdot 6\text{H}_2\text{O}$ , AR), iron(III) nitrate nonahydrate ( $\text{Fe}(\text{NO}_3)_3 \cdot 9\text{H}_2\text{O}$ , 98%), potassium hydroxide (KOH) were obtained from Sinopharm Chemical Reagent Co., Ltd. Urea (AR), zinc acetate ( $\text{Zn}(\text{CH}_3\text{COO})_2 \cdot 2\text{H}_2\text{O}$ , AR) were purchased from Aldrich. Nafion (5 wt%) and 20% Pt/C were purchased from HESSEN. Ruthenium (IV) oxide ( $\text{RuO}_2$ , 99.9%) was obtained from Alfa Aesar.

### 2. Characterizations

A Bruker D8 Advance X-ray polycrystalline diffractometer (Bruker, Billerica, MA, USA) was also used to record the X-ray diffraction (XRD) spectra with a scanning range of  $10^\circ$ – $80^\circ$  and a scanning speed of  $4^\circ \text{ min}^{-1}$ . The JEOL JSM-7100F scanning electron microscope (Japan Electron Optics Laboratory, Tokyo Akishima Station, Tokyo, Japan) was also used to analyze the particles and morphology of the catalyst, The FEI Talos-S transmission electron microscope (Frequency Electronics, Inc., Columbia, MD, USA) was used to analyze the particle size and morphology of the catalyst. Raman spectroscopy was detected at 514 nm using Horiba Scientific LabRAM HR Evolution Raman spectrometer (HORIBA Scientific, Palaiseau, France). The model of the automatic specific surface and porosity analyzer is Mike 2460 (Micromeritics, Atlanta, GA, USA). We also used X-ray photoelectron spectroscopy analyzer Thermo

Scientific ESCALAB 250Xi (Thermo Scientific, Thermo Scientific, Waltham, MA, USA) to analyze elements.

### 3. Electrochemical experiments

All electrochemical tests were performed on the IVIUM instrument (Lvium Technologies BV, Eindhoven, Netherlands) at 25 °C. The electrolytic cell used a traditional five-port electrolytic cell with an electrolyte of 0.1 M KOH. A platinum wire and Ag/AgCl electrode were used as the counter electrode and the reference electrode, and the salt bridge used a saturated KCl solution. The working electrode was a rotating disk electrode (RDE), and the electrode was a 5 mm glass-carbon disk. For typically preparing the catalyst ink, 5 mg of the FeNi@NC sample was put into the mixture containing 0.90 mL of ethanol, 0.10 mL of water, and 10  $\mu$ L of 5 wt%Nafion. Next, the mixture was ultrasonicated for at least 30 min to obtain a homogeneous suspension. After that, 10  $\mu$ L of the catalyst ink was dropped onto the RDE with a catalyst loading of 0.25 mg cm<sup>-2</sup>. In the controls, commercial Pt/C and RuO<sub>2</sub> catalysts modified electrodes were constructed in a similar way. The linear sweep volt-ampere (LSV) curve is 0.2–1.2 V (vs. RHE), and the sweep rate is 5 mV s<sup>-1</sup>.

The conversion of Ag/AgCl electrode and standard hydrogen electrode is as follows:

$$V_{\text{RHE}} = V_{\text{Ag/AgCl}} + 0.059\text{pH} + 0.197$$

The Koutecky-Levich (K-L) equation is used to calculate the number

of electrons transferred in the ORR process. Obtain the LSV curves of the relevant catalysts at 400, 625, 900, 1225, 1600 rpm. Based on these curves, calculate the electron transfer number (N) of each oxygen molecule involved in the ORR process according to the Koutecky-Levich (K-L) equation as follows:

$$1/i = 1/i_k + 1/i_d = 1/i_k + 1/(B\omega^{1/2}) \quad (1)$$

$$B = 0.2nFC_0D_0^{2/3}\nu^{-1/6} \quad (2)$$

Where  $i$  is the experimentally measured current,  $i_k$  is the kinetic current,  $i_d$  is the diffusion-limiting current,  $\omega$  is the rotating speed,  $n$  is the number of transferred electrons,  $F$  is the Faraday constant (96485 C mol<sup>-1</sup>),  $C_0$  is the oxygen solubility (1.26×10<sup>-3</sup> mol L<sup>-1</sup>),  $D_0$  is the oxygen diffusivity (1.93×10<sup>-5</sup> cm<sup>2</sup> s<sup>-1</sup>), and  $\nu$  is the kinetic viscosity of the electrolyte (0.01 cm<sup>2</sup> s<sup>-1</sup>).

The OER measurements were conducted in the O<sub>2</sub>-saturated 1.0 M KOH solution. The electrocatalytic activity was critically examined by LSV at 1600 rpm and 5 mV s<sup>-1</sup>. All of the OER data were corrected with the iR compensation (90%).

#### 4. Zn–air battery test

The homemade rechargeable Zn-air batteries were assembled by using a freshly-polished Zn plate as the anode, a 6.0 M KOH solution containing 0.2 M Zn(CH<sub>3</sub>COO)<sub>2</sub> as the electrolyte, and the catalyst coated on a carbon paper as the cathode. The air cathode was typically prepared

by sequentially casting the catalyst ink (5 mg of the FeNi@NC powder, 1 mL of ethanol and 50  $\mu$ L of a Nafion solution (5 wt%)) on the carbon paper with an average catalyst loading of 1.0 mg cm<sup>-2</sup>, combined by drying at 60 °C for 4 h. For comparison, the air electrodes based on Pt/C (20 wt%) + RuO<sub>2</sub> were also fabricated similarly with the identical mass loading.

The polarization curves of the charge and discharge processes were acquired by LSV at a sweep rate of 5 mV s<sup>-1</sup>. The charge-discharge cycling test was conducted at a current density of 10 mA cm<sup>-2</sup>. Each cycle contained one discharge process at 10 mA cm<sup>-2</sup> for 15 min, and another charge process for 15 min. All of the Zn–air batteries were tested in ambient atmosphere on a CHI 660E electrochemical workstation.

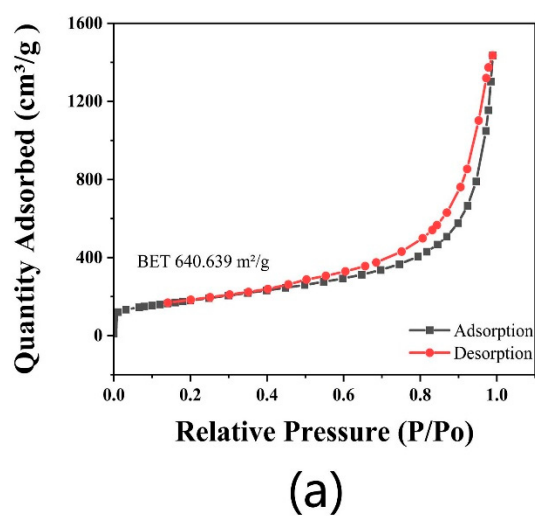

**Figure. S1** (a)  $N_2$  sorption isotherms of FeNi@NC.

**Table S1.** Comparison of the ORR/OER catalytic data of the FeNi@NC with other FeNi-based catalysts early published.

| Catalysts                                 | $E_{1/2}$ (V) | $E_{j=10}$ (V) | $\Delta E$  | References       |
|-------------------------------------------|---------------|----------------|-------------|------------------|
| <b>FeNi@NC</b>                            | <b>0.84</b>   | <b>1.59</b>    | <b>0.75</b> | <b>This work</b> |
| FeNi-NC                                   | 0.83          | 1.64           | 0.81        | [1]              |
| Fe-enriched-<br>FeNi <sub>3</sub> /NC     | 0.79          | 1.59           | 0.80        | [2]              |
| FeNi/NC                                   | 0.81          | 1.58           | 0.77        | [3]              |
| FeNi@NCNT-CP                              | 0.85          | 1.58           | 0.73        | [4]              |
| NiCoFe@N-CNFs                             | 0.81          | 1.50           | 0.69        | [5]              |
| Fe <sub>0.5</sub> Ni <sub>0.5</sub> @N-GR | 0.83          | 1.44           | 0.61        | [6]              |
| CoFeNi@CNT                                | 0.82          | 1.67           | 0.85        | [7]              |
| NiFe@NCNT                                 | 0.79          | 1.56           | 0.77        | [8]              |
| NiFe/N-CNT                                | 0.75          | 1.52           | 0.77        | [9]              |
| FeNi@NCSs                                 | 0.84          | 1.54           | 0.70        | [10]             |

## References

- [1] Yang L, Zeng X F, Wang D, et al. Biomass-derived FeNi alloy and nitrogen-codoped porous carbons as highly efficient oxygen reduction and evolution bifunctional electrocatalysts for rechargeable Zn-air battery[J]. *Energy Storage Materials*, 2018, 12: 277-283.
- [2] Chen K, Kim S, Rajendiran R, et al. Enhancing ORR/OER active sites through lattice distortion of Fe-enriched FeNi<sub>3</sub> intermetallic nanoparticles doped N-doped carbon for high-performance rechargeable Zn-air battery[J]. *Journal of Colloid and Interface Science*, 2021, 582: 977-990.
- [3] Li G L, Xu X C, Yang B B, et al. Micelle-template synthesis of a 3D porous FeNi alloy and nitrogen-codoped carbon material as a bifunctional oxygen electrocatalyst[J]. *Electrochimica Acta*, 2020, 331: 135375.
- [4] Zheng X J, Cao X C, Zeng K, et al. A self-jet vapor-phase growth of 3D FeNi@NCNT clusters as efficient oxygen electrocatalysts for zinc-air batteries[J]. *Small*, 2021, 17(4): 2006183.
- [5] Cao F, Yang X, Shen C, et al. Electrospinning synthesis of transition metal alloy nanoparticles encapsulated in nitrogen-doped carbon layers as an advanced bifunctional oxygen electrode[J]. *Journal of Materials Chemistry A*, 2020, 8(15): 7245-7252.
- [6] Liu P T, Gao D Q, Xiao W, et al. Self-powered water-splitting devices by core-shell NiFe@N-graphite-based Zn-Air Batteries[J]. *Advanced Functional Materials*, 2018, 28(14): 1706928.

- [7] Chen D, Li G F, Chen X, et al. Developing nitrogen and Co/Fe/Ni multi-doped carbon nanotubes as high-performance bifunctional catalyst for rechargeable zinc-air battery[J]. Journal of Colloid and Interface Science, 2021, 593: 204-213.
- [8] Jiang M X, Tan Z, Cao M H. A robust bifunctional electrocatalyst for rechargeable zinc-air batteries: NiFe nanoparticles encapsulated in nitrogen-doped carbon nanotubes[J]. International Journal of Hydrogen Energy, 2021, 46(29): 15507-15516.
- [9] Lei H, Wang Z L, Yang F, et al. NiFe nanoparticles embedded N-doped carbon nanotubes as high-efficient electrocatalysts for wearable solid-state Zn-air batteries[J]. Nano Energy, 2020, 68: 104293.
- [10] Lin S Y, Zhang X, Sang S Y, et al. Bio-derived FeNi alloy confined in N-doped carbon nanosheets as efficient air electrodes for Zn-air battery[J]. J Colloid Interface Sci, 2022, 628(Pt A): 499-507.
